# Supplementary material for: Air clathrate hydrates in the EDML ice core, Antarctica
Source: Copernicus journal article supplement (doi:10.5194/egusphere-2025-633), 2025-03-12
Supplement: Supplementary file [file egusphere-2025-633-AC1-supplement.pdf]

**Air clathrate hydrates in the EDML ice core, Antarctica**

**Referee report #1**

**General comments**

The manuscript presents the first experimental data on the air-hydrate geometrical properties in the EDML ice core, below the bubbles-to-hydrates transition, which were obtained by automated image analysis of microphotographs of thick sections of ice taken in the field a few days after core retrieval. The resulting data set represents a significant addition to the existing experimental data on the geometric properties of air hydrates in polar ice sheets, which until recently were obtained only from GRIP, Vostok, and Dome Fuji ice cores. Specific conditions of the EDML site on the Antarctic Plateau (relatively warm temperature of ice and enhanced accumulation, location on the ice divide) allowed authors to reveal some new peculiarities of hydrate properties such as weakening of their correlation with the climate (isotope content of ice) on small time scales, and a distinctive change in air hydrate properties associated with changes in the deformation regime of ice reflected in its microstructure. The most important achievement of this work is a carefully developed technique of using automatic analysis of high-quality images of thick sections of ice in order to obtain various geometric characteristics of air-hydrate inclusions in polar ice. This technique was, for the first time, successfully applied to quantitatively describe air hydrates in an Antarctic ice core. Its further refinement will provide a reliable tool for the study of future ice cores, including those that will be obtained in Antarctica as part of the Oldest Ice project. To summarize, I believe that this work deserves to be published in TC after the small corrections and clarifications suggested below are made by the authors.

We want to thank the reviewer for the thorough review and especially the additional insights that will improve the manuscript. We reply to the specific comments and technical corrections below.

Concerning the presentation of the material, I would like to encourage the authors to make an additional effort to improve the structure of the text in order to make it easier to read and understand. To me, the most obvious idea in this regard would be to move sections 4.1 and 4.2 of the ms from Discussion to Results, and to merge them with sections 3.1 and 3.2, respectively. Some of my specific comments below also reflect the difficulties I encountered in reading the manuscript and therefore, hopefully, may help to improve its presentation.

Our aim was to clearly separate measured results and the discussion of the measured values. We understand that this might make it more difficult to read and could lead to a misinterpretation of the message of the manuscript.

We will improve the structure of the text and especially try to better differentiate between method-related results and measured results. For this, we will follow the reviewer's advice and move sections 4.1 and 4.2 from Discussion to Results, and merge them with sections 3.1 and 3.2, respectively. I.e. we move section 4.1 to 3.1.1 and the first paragraph of 4.2. to 3.2.1.

However, L263 – L273 should not be merged with section 3.2. We propose to merge these lines with section 4.3.1 and add them after L301.

This should hopefully improve the clarity and presentation of the manuscript.

### Specific comments

L15-17: The BHTZ depth range depends on the temperature in the ice sheet (e.g., 500-1250 m at the cold Vostok site, but 1000-1500 m at the GRIP drilling site, which is warmer). What site does the 500-1500 m depth interval refer to? I did not find in the ms clear information about the BHTZ depths at the EDML site, which is important for interpreting the bubble and hydrate data.

The 500 – 1500m depth interval mentioned includes the minimum depth of the BHTZ (Vostok) and the maximum depth (GRIP) observed for deep ice cores. We agree that this could lead to misunderstandings. We will delete the depth range from L15-L17 and clearly state the extend of the BHTZ for EDML (700m to 1225m) at L41 where we introduce the EDML ice core.

At L249 one reads: “Note that LGM-ice at EDML coincides with the top of the BHTZ”, which is a bit misleading, since the LGM ice at EDML is buried at a depth of about 1000 m. According to Bendel et al. (2013), the BHTZ at EDML is between 700 and 1200 m and therefore LGM ice coincides with the middle of the transition zone, which disrupts the correlation of bubbles’ properties with climate. Please state clearly the BHTZ depths at EDML in the introduction. It would also be useful to give in the **introduction** the maximal depth (from the ice core log) of the borehole when it reached the bedrock (at 2774.15 m?).

We agree that our wording is not very precise. We will change:

“Note that LGM-ice at EDML coincides with the top of the BHTZ, therefore, air bubbles are already starting to convert to air hydrates.”

to

“Note that LGM-ice at EDML is located within the BHTZ (at about 1000 m depth), therefore, air bubbles are already converting to air hydrates.”

In addition, we will add information about the BHTZ at EDML in the Introduction as well as the maximum logging depth. It is indeed 2774.15m (Wilhelms et al., 2014; <https://doi.org/10.3189/2014AoG68A189>)

L28-30: To the best of my knowledge, the most recent review on this topic is given in Lipenkov V. Y. How air bubbles form in polar ice, Earth’s Cryosphere, 2018, 22, 16–28.

We thank the reviewer for the introduction to this very useful publication. We will add it to our references.

L186-188: For hydrate inclusions with non-isometric shape and preferred orientation in space, it is also important to choose the right plane for the thick section analysis (i.e. image

plane) that would allow proper assessment of inclusions' dimensions and aspect ratios. Have you tried to solve this problem, and if so, how?

If the objects have a preferred orientation, then the “perfect-observation” plane would be the one in which the objects show the maximum elongation. With our technique we can unfortunately not make sure we are measuring the maximum elongation.

We tried to estimate the change in projection properties of an ellipsoid that is rotated around to core axis, but decided not to include it in the manuscript.

Below are the results of three end-member cases. On the left side, the ellipsoid together with the projection to the XZ-plane, which corresponds to the plane of the microphotograph, can be seen (c.f. Fig.1 in the manuscript). The plots on the right side show the evolution of the projection properties with progressing rotation around the Z-axis (core axis). a (red), b (green), c (blue) are the ellipsoid axis and the orientation is the angle ( $-17^\circ$ ) between the semi-major axis (a) and the X-axis.  $0^\circ$  on the x-axis of the plots represents the initial condition as seen on the left image.

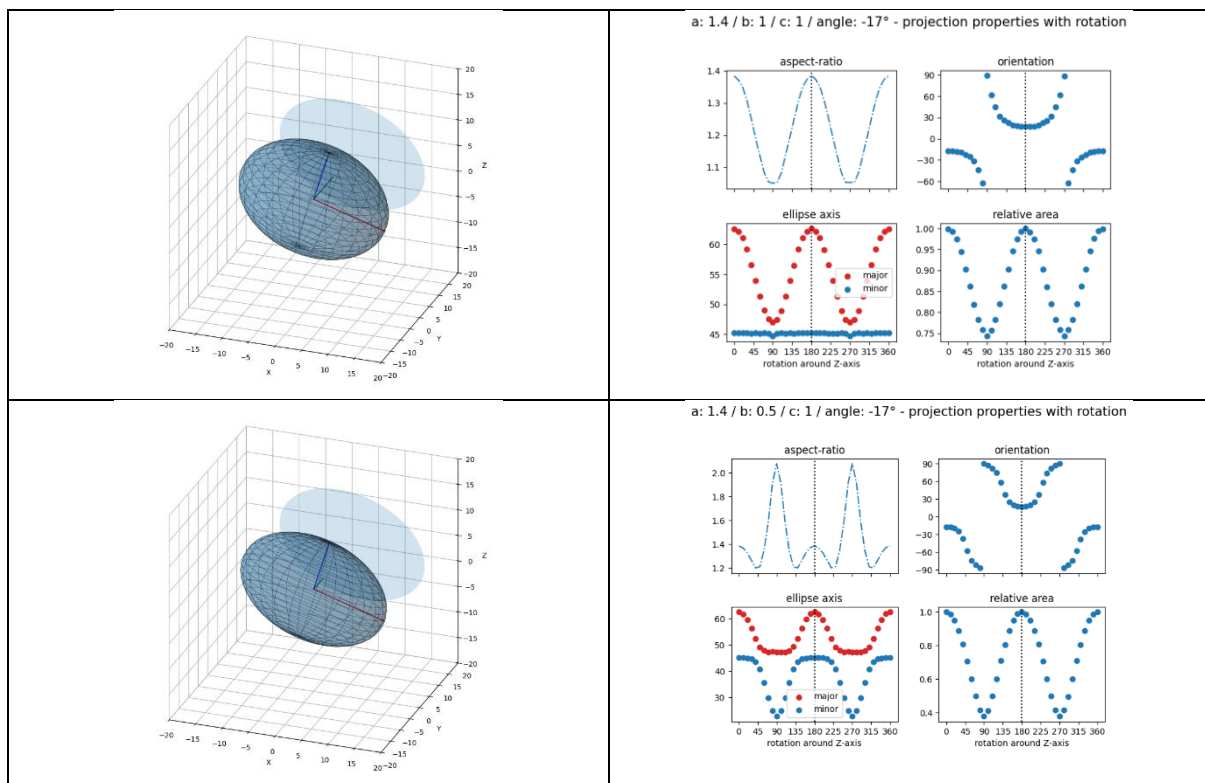

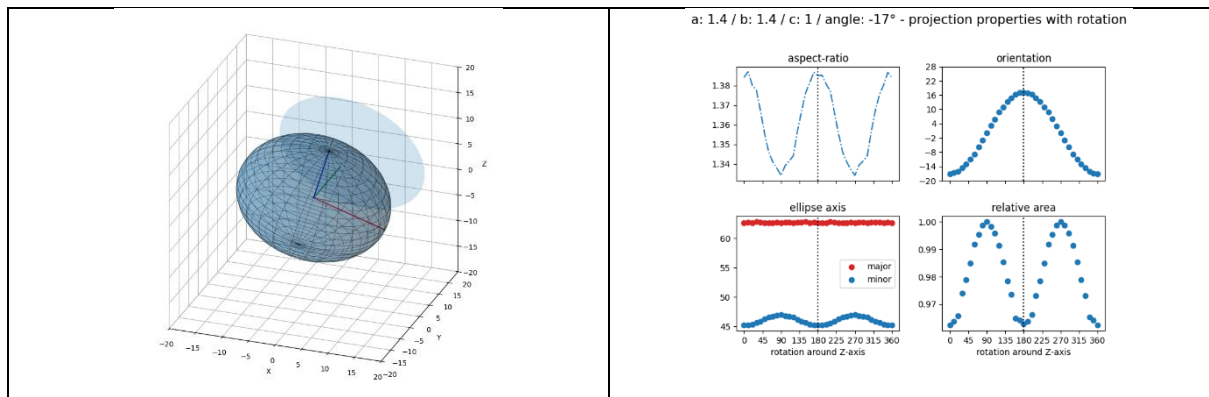

In summary, the challenge lies in the fact that we do not know if we measured the maximum elongation and that the third dimension is unknown, i.e. if the non-isometric object is more cigar (prolate)-like or more oblate-like.

For our interpretation of the air hydrate shape characteristics, we consider the relative orientation of the samples to each other. As mentioned in section 2.5.2., a change in relative orientation could be caused due to a difficulty in matching core breakpoints during ice-core logging.

Weikusat et al., (2017) report a loss in azimuthal orientation between 1686m and 1696m as well as between 1955m and 2035m depth.

Between 1665m and 1695m, we observe an increase in air hydrate median inclination from  $17^\circ$  to  $22^\circ$  as well as a “polarity” change. Below are the orientation plots of the air hydrate major axis (“rose plots”), “n” corresponds to the number of measured objects.

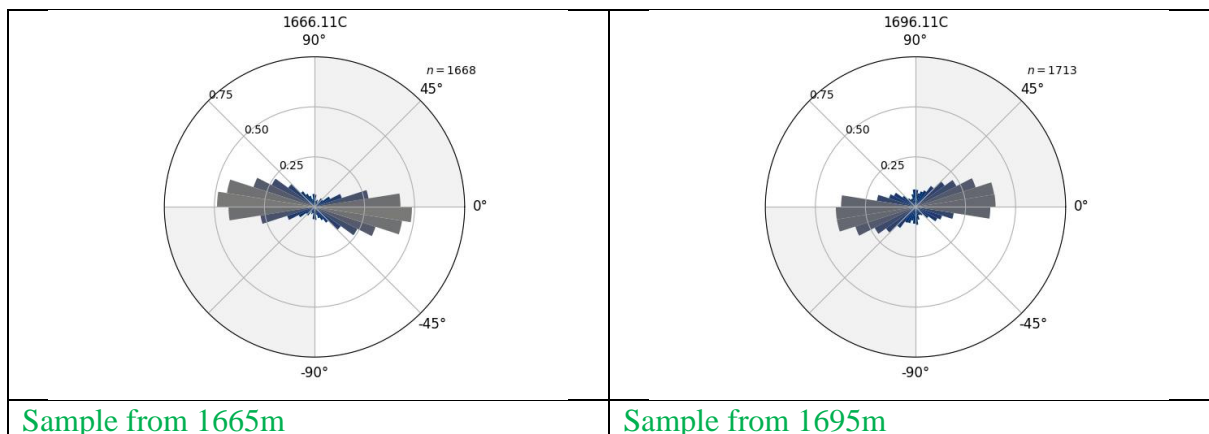

However, we do not observe a significant change in the median AR from 1665m to 1695m depth.

Between 2005 and 2035m depth, we observe a rather continuous decrease in the median inclination ( $16^\circ$ ,  $14^\circ$ ,  $10^\circ$ ) and increase in AR (1.38, 1.4, 1.46). Below are the orientation plots displaying the continuous decrease in orientation.

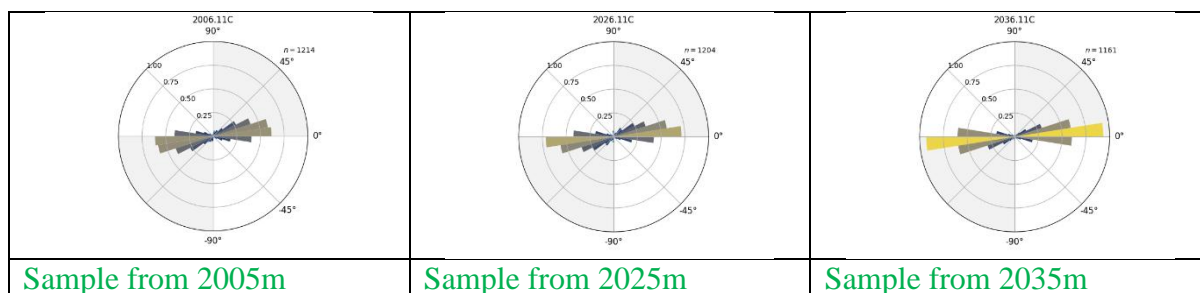

The fact that the median AR does not change between 1665m and 1695m, while the orientation does (Fig. 7b), implies that either the air hydrates are not very well sorted, or that the majority is rather isometric in shape.

On the contrary, the continuous and joint change of AR together with orientation from 2005 to 2035m depth (Fig. 7b) point either towards an increase in sorting or a decrease in isometric air hydrates. Both could be induced by the increase in simple shear deformation.

In the future, this problem could be addressed with taking images from two (or more) different directions.

If the reviewers and the editor deem it appropriate, we would suggest including this information in the Appendix.

L196 “Surprisingly, no air hydrates were found in the lowermost sample at about 2774 m depth”: Any comment on this: distance of this sample from the bedrock, measured air content in it, accreted ice?

This question is related to a question asked by reviewer#2 (196). We will provide identical answers to the two related questions:

The lowermost sample is from 2773.91 m depth. This means that it is about 25 cm above the bottom of the ice core. To the best of our knowledge there are no air content measurements for this sample. However, it was reported that, from 2760 m, the concentration of micro inclusions gradually decreases with depth (Faria et al., 2010). The bottom of the core reaches the pressure melting point ( $-2^{\circ}\text{C}$ ; Faria et al., 2010) and ice core drilling was terminated because subglacial water was entering the borehole (Wilhelms et al., 2014).

Therefore, it could either be accreted ice with no, or very little impurity inclusions (at least in the 10cm sample!). Or meteoric ice that underwent processes which resulted in the expulsion of impurities and gases, for instance the segregation of impurities to the grain boundary network and the subsequent drainage to the bedrock driven by the hydraulic gradient (Rempel 2002,2005). These processes are considered to alter the basal ice at EDC, Dome Fuji and NEEM (Tison et al., 2015; Ohno et al., 2016; Goossens et al., 2016).

While we currently cannot explain its origin, we think that the information about the air hydrate content in the deepest sample is an interesting detail that deserves mentioning. Further investigations of the deepest ice at EDML are necessary to determine its origin and explain the absence of air hydrates.

We will add this discussion about the last sample to the end of paragraph 4.3.2

Rempel et al., 2002: <https://doi.org/10.1029/2002JB001857>

Rempel 2005: <https://doi.org/10.3189/172756405781813564>

Faria et al., 2010: <https://doi.org/10.1016/j.quascirev.2009.10.016>

Tison et al., 2015: <https://doi.org/10.5194/tc-9-1633-2015>

Goossens et al., 2016: <https://doi.org/10.5194/tc-10-553-2016>

Ohno et al., 2016: <https://doi.org/10.1002/2015JF003777>

L68-69 “For this study, mosaic images located about 1.5 mm below the sample surface were analyzed...”; L179 “We convert the measured air hydrate counts per sample to Nah using the measured ice-sample thickness...”; L180-182 “Air hydrate counts per sample and Nah have a good linear correlation (Fig. 4) and we conclude that the observed volume (i.e. hydrate mapping depth; Fig. 1) is consistent for all samples”; L253-254 “... the hydrate-mapping depth in our microscopic set-up might not correspond to the physical sample thickness (Fig. 1). In other words, the microphotographs from one focus plane might not display the entire sample volume”. The construction of the narrative is such that it is not until L253-255 that the reader begins to realize that you could not have obtained Nah (in cm<sup>3</sup>) because you did not know the thickness of the ice layer (the hydrate mapping depth) within which the hydrate counts were made. Why not say this at the very beginning, and treat the hydrate count data as a reliable but relative metric of Nah (assuming the observed volume was the same in all samples), and then scale that metric with the measured air content of ice, and use the thus derived Nah in further consideration? (Such a relative metric of Nah can be the density of hydrates’ projections (cm<sup>2</sup>) observed over an 80 x 30 mm area of the mosaic image of the sample).

As stated above, our aim was to clearly separate the description of measured results and the discussion of the measured values. The conclusion, that we did not know the thickness of the hydrate mapping, depth is derived from discussing our measured values with available literature. We agree with the reviewer that this could lead to a misinterpretation of the data.

To address this, we will follow the reviewer’s suggestion regarding the presentation of the material as explained on page one.

Regarding the conversion of air hydrate counts to Nah, we believe that using the measured sample thickness represents the most accurate values by making the least assumptions. I.e. we stay closes to the real appearance.

Figure 5 caption: “Error-band for b) is explained in section 2.4”. I could not find an estimate of the resulting Nah error in Section 2.4. In any case, I now suspect that this resulting error shown in Fig. 5 does not account for the difference between the sample thickness that was used to calculate Nah and the hydrate mapping depth.



We agree. The orange error band in Figure 5 is displayed for the air hydrate counts and is derived from the analysis of the “ground truth” (manually segmented) images. The values used are given in Table 2.

We will add error bars to the  $N_{ah}$  values in Figure 5 including the uncertainty in thickness measurements.

L226 “Naturally, the TACH and  $V_c$  signals show the same pattern (Fig. 6b)”. Not sure that this statement matters when both TACH and  $V_c$  are shown by a single graph. Delete the sentence?

We agree that this sentence may be redundant, however, we added it to emphasize the direct connection of air hydrate  $V_c$  and TACH, which might not be immediately obvious to an audience not very familiar with this topic. This was confirmed by a question of referee #2, we thus decided to keep it in the manuscript.

L237-241: It would be appropriate here (or elsewhere) to provide information on the inclination of the borehole from which the studied ice core was obtained.

The inclination of the borehole was measured in 2005 and is roughly between  $\pm 3^\circ$  (Weikusat et al., 2017; <https://doi.org/10.1098/rsta.2015.0347>). We will add this information to the manuscript in the Introduction at L38.

L247-248: In Fig. 3 from Bendel et al. (2013), the average  $N_{ab}$  value in LGM ice appears to be closer to 400  $\text{cm}^{-3}$ .

We agree. 500  $\text{cm}^{-3}$  represents the lowest measured value, but most values are closer to 400  $\text{cm}^{-3}$ . We will consider this together with the comment below (L250-251).

L250-251: Number concentration of air bubbles and that of succeeding hydrates (if we assume one-to-one conversion) depends on the ice formation conditions (accumulation rate, firn temperature and surface snow density), so the properties of the Vostok ice cannot be simply projected onto the EDML ice core. Using a simple model, as described in Lipenkov (2018), one can estimate  $N_{ab} \sim 400 \text{ cm}^{-3}$  for present-day conditions at EDML ( $-44.5^\circ\text{C}$ ; 6.4  $\text{g/cm}^2 \text{ yr}$ ; 0.38  $\text{g/cm}^3$ ) and  $N_{ab} \sim 475 \text{ cm}^{-3}$  in the LGM ice (assuming:  $-54^\circ\text{C}$ ; 3  $\text{g/cm}^2 \text{ yr}$ ; 0.38  $\text{g/cm}^3$ ). The model estimate for Holocene ice is close to Bendel’s et al. data while that for the LGM ice is slightly higher than their experimental data (because LGM ice coincides with the transition zone), and lower than the Vostok-based value used in the ms (the extremely low LGM temperature at Vostok led to a very small grain size at close-off and hence a great number of bubbles forming).

We agree with the reviewer that the  $N_{ab}$  properties of the Vostok ice core cannot be fully projected to the EDML ice core. Our estimation pairing the observations at EDML (300-400  $\text{cm}^{-3}$   $N_{ab}$ ) with observations at Vostok (factor of 1.7) would have represented a “worst-case” with respect to  $N_{ab}$  for LGM conditions.

We want to thank the reviewer for the very useful information regarding the  $N_{ab}$  estimations using the model described in Lipenkov (2018). Especially for the LGM conditions, where “true”  $N_{ab}$  of EDML cannot be measured, they provide a better estimation compared to the “worst-case” we used previously. We will implement the new estimations of

- Nab ~400 cm<sup>3</sup> for present-day conditions at EDML (-44.5 °C; 6.4 g/cm<sup>2</sup> yr; 0.38 g/cm<sup>3</sup>)
- Nab ~475 cm<sup>3</sup> in the LGM ice (assuming: -54 °C; 3 g/cm<sup>2</sup> yr; 0.38 g/cm<sup>3</sup>)

in our manuscript. We will then recalculate the detection rate of air hydrates based on estimations from air bubble content.

L259: It appears that the CFA system used by Ruth et al. (2004) does not provide accurate absolute values of air content (it was designed primarily to document high-resolution relative TAC variations). For that reason, the obtained average value (0.0815 cm<sup>3</sup>/g) is lower than the TAC measured with absolute methods in the Holocene ice cores from the most elevated drilling sites in Antarctica (Dome F, Vostok, EDC). For the EDML elevation (2892 masl) and atmospheric pressure (~700 mb) we can expect the TAC to be slightly above 0.09 cm<sup>3</sup>/g (Martinerie et al., 1992) in Holocene ice and even higher in LGM ice. This prediction has been confirmed by the measurements made with an absolute barometric method in LGGE/IGE, Grenoble, which gave TAC=0.0906±0.0025 cm<sup>3</sup>/g in Holocene ice, 0.0970±0.0020 cm<sup>3</sup>/g in LGM ice, and a mean value equal to 0.0924±0.0031 cm<sup>3</sup>/g (unpublished data). I suggest that the authors use estimates based on Martinerie, P., Raynaud, D., Etheridge, D.V., Barnola, J.-M., Mazaudier, D. Physical and climatic parameters which influence the air content in polar ice. *Earth Planet. Sci. Lett.* 1992, 112: 1-113, rather than the experimental data from Ruth et al. (2004).

The values from Ruth et al. (2004) were, to the best of our knowledge, the most direct TAC measurements for EDML. We highly appreciate the reviewer's insights on the unpublished measured TAC for the EDML ice core which agree with the estimations by Martinerie et al., 1992. Or rather, the theory agrees well with the measurements. We will use the estimates for TAC based on Martinerie et al., 1992, as suggested by the reviewer, to replace the obtained average value from Ruth et al. (2004).

L260: It may be noted here that uncertainty in hydrate size determination can also be the cause of the observed mismatch between calculated and measured air content ( $V_c$  is very sensitive to even small errors in hydrate linear dimensions), but in this particular case the greatest contribution to this mismatch comes, of course, from the uncertainty in  $N_{ah}$ .

We agree that the  $V_c$  is very sensitive to even small errors in determining the air hydrate size. We will add this information to the manuscript.

We further discuss this point for the reviewer's comments for L269-273, L310-312 and L312-313.

L267: Replace "air hydrates dissociating" with "air hydrates dissolving".

We will replace "air hydrates dissociating" with "air hydrates dissolving".

L269-273: This reasoning seems a bit odd to me, because: 1) below the BHTZ, almost all of the air trapped by ice (98% or so) is stored in air hydrates. Therefore, whatever evolution the hydrate system undergoes (growth of larger hydrates at the expense of smaller ones, coalescence, etc.), the geometric properties of the hydrate ensemble, if accurately measured, should allow us to correctly estimate the TAC; 2) if the cage occupancy in Eq. (9) is



erroneously overestimated, the calculated TACH must also be overestimated, but it seems to show the opposite trend?

1) In principal we do agree with the reviewer that almost all of the air trapped in ice is stored in air hydrates. However, as the reviewer states in L260,  $V_c$  is very sensitive to even small errors in hydrate linear dimensions. We do have uncertainties in the measurements, which increase with complex-shaped and clustered AH in the images. In the depth region just below the BHTZ we do observe more complex-shaped AH compared to deeper parts, which partly seem to show recrystallization towards an equilibrium state (regular and rounded morphologies). Below, some examples for complex-shaped AH can be seen which seem to be in a transition stage to a more regular object.

|                                                                                   |                                                                                   |                                                                                   |                                                                                   |                                                                                     |                                                                                     |
|-----------------------------------------------------------------------------------|-----------------------------------------------------------------------------------|-----------------------------------------------------------------------------------|-----------------------------------------------------------------------------------|-------------------------------------------------------------------------------------|-------------------------------------------------------------------------------------|
|  |  |  |  |  |  |
| 1285m                                                                             | 1285m                                                                             | 1355m                                                                             | 1355m                                                                             | 1405m                                                                               | 1566m                                                                               |
| D = 286 $\mu\text{m}$                                                             | D = 189 $\mu\text{m}$                                                             | D = 325 $\mu\text{m}$                                                             | D = 247 $\mu\text{m}$                                                             | D = 270 $\mu\text{m}$                                                               | D = 202 $\mu\text{m}$                                                               |
| Cloudy with protrusion                                                            | Disc-like, flat ?                                                                 | Cloud-like; hollow ?                                                              | Disc-like, flat ?                                                                 | Hollow ring                                                                         | Cloudy with protrusion                                                              |

We refer here to Pauer et al. (2000), Kipfstuhl et al. (2001) and Weikusat et al. (2015), who discuss air hydrate metamorphosis / recrystallization and their different morphologies.

Pauer et al., 2000: doi:10.2312/polarforschung.68.267

Kipfstuhl et al., 2001: <https://doi.org/10.1029/1999GL006094>

Weikusat et al., 2015: <https://doi.org/10.3189/2015JoG15J009>

2) From 1255 – 1700m the TACH decreases from 0.085 cm<sup>3</sup>g<sup>-1</sup> to an average of 0.059 cm<sup>3</sup>g<sup>-1</sup>. This means the TACH is overestimated relative to the average value. A lower cage occupancy would lower the TACH. The variations in cage occupancy with different formation conditions however, are not large enough to solely explain the overestimated TACH.

E.g. Uchida et al., 1999: <https://doi.org/10.1002/aic.690451220>

Hachikubo et al., 2022: <https://doi.org/10.1021/acs.jced.2c00602>

We will modify the manuscript in L263-273 as follows and include the table above as a new figure:

“From 1255 m to 1700 m (spanning about 26 kyr), the TACH decreases from 0.085 cm<sup>3</sup> g<sup>-1</sup> to 0.059 cm<sup>3</sup> g<sup>-1</sup>. For the same depth region, we observe a decrease in the RSD of the air hydrate D distribution (Fig. 5c) and a strong decrease in the AR 90% percentile from 2.5 to 2 (Fig. 7c). One explanation for the overestimation of the TACH (relative to the average value

of 0.059 cm<sup>3</sup> g<sup>-1</sup>) could be the fact that the air hydrates' true cage occupancy for this region is probably slightly lower than our estimated 0.9, as it depends on pressure and temperature (Chazallon and Kuhs, 2002). However, the variations in gas hydrate cage occupancies with different formation conditions (e.g. Uchida et al., 1999; Hachikubo et al., 2022) are not large enough to solely explain the observed deviation from the mean.

Another reason could be an uncertainty of the air hydrate size, as the calculation of  $V_c$  is very sensitive to errors in size determination. In the depth region just below the BHTZ we observe more complex-shaped air hydrates (Fig. ) compared to deeper parts, which is indicated in the data by the decrease in the RSD and the AR 90% percentile (Fig. 5, 7c). The complex-shaped air hydrates partly seem to show a recrystallization towards an equilibrium state (regular and rounded morphologies).

For the Vostok ice core, Lipenkov (2000) reported a depth region of faster air hydrate crystal growth rates, extending about 300 m below the BHTZ (i.e. down to 1550 m), and explains this by the large number of small, oxygen-enriched air hydrates dissolving in this region. Down to the same depth, Suwa and Bender (2008) measured noisy  $\delta O_2/N_2$  ratios. Similarly, Oyabu et al. (2021) reported a large scatter in measured  $\delta O_2/N_2$  ratios for about 300 m (spanning 25 kyr) below the BHTZ for the Dome Fuji ice core. Therefore, we surmise that the region from about 1255 - 1700 m at EDML coincides with a region of relatively faster air hydrate growth and recrystallization and the air hydrate ensemble might not have reached an equilibrium state. In summary, the overestimation likely originates from uncertainties of measurements in air hydrate size, which increase with complex-shaped air hydrates in the images.”

L286-289: The geometric properties of air hydrates (inherited from the properties of bubbles) depend on both the temperature and accumulation rate prevailing during ice formation. The correlation between accumulation and temperature (isotope content of ice) on small time scales is not as obvious as in the case of global glacial-interglacial climate changes, and may not exist at all. This may also be the reason for the weakened correlation between  $N_{ah}$  and  $\delta^{18}O$  in the case of smaller-scale climatic fluctuations.

We want to thank the reviewer you for this comment. We will add this information to L287 where we discuss possible reasons for the poorer correlation between  $N_{ah}$  and  $\delta^{18}O$  on smaller timescale compared to glacial-interglacial transitions.

L299-300: I would rewrite as “Due to the greater surface curvature, smaller particles are more soluble than larger particles...”

We agree that this wording provides more clarity and we will we adopt it into our manuscript.

L310-312: With the exception of two data points, I do not see particularly large mean hydrate diameters in region 2 in Fig. 5c. It would be good to say here how the inability of your image analysis to distinguish individual air-hydrate crystals within their clusters may affect the count of hydrate number? It seems like it should lead to an underestimation of the number of individual hydrates (although the hydrate number concentration shows anomalously high values in zone 2).

We agree with the reviewer that the mean diameters in region 2 are not particularly large. However, the mean diameter is slightly overestimated considering that the samples from

region 2 correspond to a cold period (probably MIS 6) and considering the linear relation of  $N_{ah}$  and mean diameter (Fig. 8a). We also agree that the inability to distinguish individual air hydrate crystals within clusters leads to an underestimation of the air hydrate number. The quantification of the underestimation, however, is difficult.

We will add the following paragraph to the manuscript at L313:

“Besides the overestimation in volume, the increase in air hydrate clusters also leads to an underestimation of  $N_{ah}$ . However, quantification is challenging due to the difficulty in distinguishing individual air hydrate crystals within clusters from the images.”

L312-313: I cannot agree with this explanation for the abnormal volume concentration and TACH. Whatever the mechanism of hydrate coalescence, this process cannot change the initial (pre-coalescence) volume concentration of hydrates (and TACH), since this property of ice is as constant as its air content. As for the quantitative assessment of the geometrical properties of all hydrate inclusions (without discrimination into clusters and individual hydrate crystals), one would expect an underestimation of the size of hydrate clusters rather than an incorrect count of the total number of hydrate inclusions (individual crystals and their clusters), which should lead to an underestimation of the calculated total volume concentration of hydrates, but not the other way around. The underestimation of cluster size in image analysis could be quite expected due to the partial overlap of the projections of two or more individual hydrate crystals included in the cluster (see Fig. 7c) and the difficulty in assessing the cluster size in the direction normal to the image plane.

We agree with the reviewer that the volume concentration (and TAC) are very unlikely to be increased by a physical process, i.e. it is unlikely that a concentration of air hydrates, and therefore a concentration of TAC, is happening. We realize that we have to improve our explanation in the manuscript.

The abnormally high values simply result from our way of estimating the volume of the air hydrates. The diameter of an air hydrate is defined as the diameter of a circle having the same area as our measured object. For instance, if we measure a cluster that has 4 times the area of a non-cluster, the diameter would be doubled (e.g. Fig 9). The volume however, would be 8 times the one of a non-cluster.

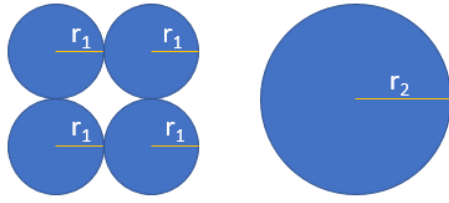

$$A1 = 4 * \pi r_1^2$$

$$A2 = \pi r_2^2$$

$$V1 = 4 * \frac{4}{3} \pi r_1^3$$

$$V2 = \frac{4}{3} \pi r_2^3$$

$$V2 = \frac{4}{3} \pi * 8 r_1^3$$

$$V1 = \frac{16}{3} \pi r_1^3$$

$$V2 = \frac{32}{3} \pi r_1^3$$

The total volume of 4 smaller air hydrates (V1) compared with the total volume of 1 larger air hydrate cluster (having the same area as the 4 smaller ones combined; V2), leads to an overestimation of V2. In this particular case  $V2 = V1 * 2$ . The relationship of V1 and V2 depends on the amount of air hydrates per cluster.

In practice, the true overestimation is difficult to assess due to the uncertainty in the amount of air hydrates per cluster and the degree of overlap of the air hydrates.

We will modify the sentence in L312: “Furthermore, the emerging of the latter explains the high mean volume and the abnormal volume concentration and TACH, as the volume of the cluster is overestimated during calculation of the volume from the area assuming a spherical shape (Fig. 6a,b).”

L326-327: It is not quite clear what phenomenon the authors have in mind, but if it is the disappearance of the climate-related variations in the hydrate properties in the course of Ostwald ripening, then the fundamental reason for this is that the hydrate growth rates are inversely proportional to the square of the mean initial hydrate size, which leads to dumping of the climatically induced variations in the hydrates’ geometrical properties (Salamatin et al., 2003).

We agree with the reviewer that the fundamental reason for the dampening of the climate related fluctuations of Nah and mean size is that the growth rates of air hydrate ensembles with smaller mean size are higher than growth rates for ensembles with a larger mean size (Salamatin et al., 2003).

Increasing age of the ice, temperature and pressure are parameters connected to the fundamental reason.

We will add this information in L326 and change “The fundamental parameters behind this phenomenon are the increasing depth (and pressure), increasing ice temperature, and increasing age of the ice (Uchida et al., 2011)” to to “The fundamental reason behind the disappearance of climate-related variations in Nah and D is the fact that air hydrate growth rates are inversely proportional to the cube of their mean initial size (Salamatin et al., 2003).

In other words, the growth rates of air hydrate ensembles with smaller mean size are higher than growth rates for ensembles with a larger mean size. Other parameters that influence air hydrate growth are increasing depth (and pressure), increasing age and increasing ice temperature (Uchida et al., 2011).”

### Technical corrections

The caption to Fig 5 needs some explanation of the zones 1 and 2 shown in the figure.

We will add the explanations for region 1 and 2 to Fig. 5 and Fig. 7.

Is the subscript 0 at  $n_0$  really needed in Eq. (9)?

The Loschmidt constant is usually given as  $n_0$  or sometimes as  $N_L$ . We will change  $n_0$  to  $N_L$  to better distinguish it from the number of cages per air hydrate unit cell ( $n$ ).

L207: Reference to Fig. 8 is given before references to Figs. 6 и 7. Consider changing the order of the figures.

We will consider changing the order along with restructuring certain paragraphs as suggested by the reviewer.

In Fig. 6, the blue and green symbols are not well distinguishable on my screen. Consider changing the colors.

We will change the colors to blue and orange to make it better distinguishable.

Best regards,

Florian Painer et al.
